# Supplementary material for: HPN, a Synthetic Analogue of Bromophenol from Red Alga Rhodomela confervoides: Synthesis and Anti-Diabetic Effects in C57BL/KsJ-db/db Mice
Source: MDPI journal article supplement (doi:10.3390/md11020350), 2013-01-30
Supplement: s1 [file s1]

marinedrugs-11-00350-s001.mol
  corina  05201404033D 1   1.00000     0.00000 
CORINA 3.49 0023  12.04.2013
 31 33  0  0  0  0  0  0  0  0999 V2000
    0.9089   -0.5877   -1.2063 C   0  0  0  0  0  0  0  0  0  0  0  0
    1.6491   -1.7500   -1.0573 C   0  0  0  0  0  0  0  0  0  0  0  0
    2.9865   -1.6760   -0.6800 C   0  0  0  0  0  0  0  0  0  0  0  0
    3.5729   -0.4413   -0.4548 C   0  0  0  0  0  0  0  0  0  0  0  0
    2.8298    0.7152   -0.6045 C   0  0  0  0  0  0  0  0  0  0  0  0
    1.5008    0.6430   -0.9799 C   0  0  0  0  0  0  0  0  0  0  0  0
    4.7717    1.8730   -2.4868 C   0  0  0  0  0  0  0  0  0  0  0  0
    3.9570    2.6288   -1.6646 C   0  0  0  0  0  0  0  0  0  0  0  0
    3.4696    2.0572   -0.3581 C   0  0  0  0  0  0  0  0  0  0  0  0
    5.2214    2.3970   -3.6884 C   0  0  0  0  0  0  0  0  0  0  0  0
    4.8512    3.6842   -4.0646 C   0  0  0  0  0  0  0  0  0  0  0  0
    4.0340    4.4372   -3.2357 C   0  0  0  0  0  0  0  0  0  0  0  0
    3.5888    3.9081   -2.0378 C   0  0  0  0  0  0  0  0  0  0  0  0
    3.5286    6.1876   -3.7423 Br  0  0  0  0  0  0  0  0  0  0  0  0
    3.6736    7.0292   -1.0148 C   0  0  0  0  0  0  0  0  0  0  0  0
    3.5238    5.7801   -0.4417 C   0  0  0  0  0  0  0  0  0  0  0  0
    2.7001    4.7275   -1.1378 C   0  0  0  0  0  0  0  0  0  0  0  0
    4.4310    7.9985   -0.3766 C   0  0  0  0  0  0  0  0  0  0  0  0
    5.0398    7.7121    0.8411 C   0  0  0  0  0  0  0  0  0  0  0  0
    4.8866    6.4577    1.4112 C   0  0  0  0  0  0  0  0  0  0  0  0
    4.1286    5.4943    0.7690 C   0  0  0  0  0  0  0  0  0  0  0  0
    0.4901    2.2282   -1.1835 Br  0  0  0  0  0  0  0  0  0  0  0  0
   -0.9066   -0.6827   -1.7264 Br  0  0  0  0  0  0  0  0  0  0  0  0
    1.0694   -2.9602   -1.2788 O   0  0  0  0  0  0  0  0  0  0  0  0
    3.7165   -2.8141   -0.5321 O   0  0  0  0  0  0  0  0  0  0  0  0
    6.0232    1.6545   -4.4979 O   0  0  0  0  0  0  0  0  0  0  0  0
    5.2904    4.2028   -5.2428 O   0  0  0  0  0  0  0  0  0  0  0  0
    4.5793    9.2275   -0.9400 O   0  0  0  0  0  0  0  0  0  0  0  0
    5.7843    8.6604    1.4705 O   0  0  0  0  0  0  0  0  0  0  0  0
    5.7117    6.0639    3.0665 Br  0  0  0  0  0  0  0  0  0  0  0  0
    3.9199    3.7837    1.5477 Br  0  0  0  0  0  0  0  0  0  0  0  0
  1  2  2  0      
  2  3  1  0      
  3  4  2  0      
  4  5  1  0      
  5  6  2  0      
  6  1  1  0      
  7  8  2  0      
  8  9  1  0      
  9  5  1  0      
  7 10  1  0      
 10 11  2  0      
 11 12  1  0      
 12 13  2  0      
 13  8  1  0      
 12 14  1  0      
 15 16  2  0      
 16 17  1  0      
 17 13  1  0      
 15 18  1  0      
 18 19  2  0      
 19 20  1  0      
 20 21  2  0      
 21 16  1  0      
  6 22  1  0      
  1 23  1  0      
  2 24  1  0      
  3 25  1  0      
 10 26  1  0      
 11 27  1  0      
 18 28  1  0      
 19 29  1  0      
 20 30  1  0      
 21 31  1  0      
M  END
$$$$
