# Supplementary material for: HPN, a Synthetic Analogue of Bromophenol from Red Alga Rhodomela confervoides: Synthesis and Anti-Diabetic Effects in C57BL/KsJ-db/db Mice
Source: MDPI journal article supplement (doi:10.3390/md11020350), 2013-01-30
Supplement: s2 [file s2]

marinedrugs-11-00350-s001.mol
  ChemDraw04241410092D

 31 33  0  0  0  0  0  0  0  0999 V2000
   -2.8579   -0.8250    0.0000 C   0  0  0  0  0  0  0  0  0  0  0  0
   -2.8579   -1.6500    0.0000 C   0  0  0  0  0  0  0  0  0  0  0  0
   -2.1434   -2.0625    0.0000 C   0  0  0  0  0  0  0  0  0  0  0  0
   -1.4289   -1.6500    0.0000 C   0  0  0  0  0  0  0  0  0  0  0  0
   -1.4289   -0.8250    0.0000 C   0  0  0  0  0  0  0  0  0  0  0  0
   -2.1434   -0.4125    0.0000 C   0  0  0  0  0  0  0  0  0  0  0  0
    0.0000   -1.6500    0.0000 C   0  0  0  0  0  0  0  0  0  0  0  0
    0.0000   -0.8250    0.0000 C   0  0  0  0  0  0  0  0  0  0  0  0
   -0.7145   -0.4125    0.0000 C   0  0  0  0  0  0  0  0  0  0  0  0
    0.7145   -2.0625    0.0000 C   0  0  0  0  0  0  0  0  0  0  0  0
    1.4289   -1.6500    0.0000 C   0  0  0  0  0  0  0  0  0  0  0  0
    1.4289   -0.8250    0.0000 C   0  0  0  0  0  0  0  0  0  0  0  0
    0.7145   -0.4125    0.0000 C   0  0  0  0  0  0  0  0  0  0  0  0
    2.1434   -0.4125    0.0000 Br  0  0  0  0  0  0  0  0  0  0  0  0
    2.1434    0.4125    0.0000 C   0  0  0  0  0  0  0  0  0  0  0  0
    1.4289    0.8250    0.0000 C   0  0  0  0  0  0  0  0  0  0  0  0
    0.7145    0.4125    0.0000 C   0  0  0  0  0  0  0  0  0  0  0  0
    2.8579    0.8250    0.0000 C   0  0  0  0  0  0  0  0  0  0  0  0
    2.8579    1.6500    0.0000 C   0  0  0  0  0  0  0  0  0  0  0  0
    2.1434    2.0625    0.0000 C   0  0  0  0  0  0  0  0  0  0  0  0
    1.4289    1.6500    0.0000 C   0  0  0  0  0  0  0  0  0  0  0  0
   -2.1434    0.4125    0.0000 Br  0  0  0  0  0  0  0  0  0  0  0  0
   -3.5724   -0.4125    0.0000 Br  0  0  0  0  0  0  0  0  0  0  0  0
   -3.5724   -2.0625    0.0000 O   0  0  0  0  0  0  0  0  0  0  0  0
   -2.1434   -2.8875    0.0000 O   0  0  0  0  0  0  0  0  0  0  0  0
    0.7145   -2.8875    0.0000 O   0  0  0  0  0  0  0  0  0  0  0  0
    2.1434   -2.0625    0.0000 O   0  0  0  0  0  0  0  0  0  0  0  0
    3.5724    0.4125    0.0000 O   0  0  0  0  0  0  0  0  0  0  0  0
    3.5724    2.0625    0.0000 O   0  0  0  0  0  0  0  0  0  0  0  0
    2.1434    2.8875    0.0000 Br  0  0  0  0  0  0  0  0  0  0  0  0
    0.7145    2.0625    0.0000 Br  0  0  0  0  0  0  0  0  0  0  0  0
  1  2  2  0      
  2  3  1  0      
  3  4  2  0      
  4  5  1  0      
  5  6  2  0      
  6  1  1  0      
  7  8  2  0      
  8  9  1  0      
  9  5  1  0      
  7 10  1  0      
 10 11  2  0      
 11 12  1  0      
 12 13  2  0      
 13  8  1  0      
 12 14  1  0      
 15 16  2  0      
 16 17  1  0      
 17 13  1  0      
 15 18  1  0      
 18 19  2  0      
 19 20  1  0      
 20 21  2  0      
 21 16  1  0      
  6 22  1  0      
  1 23  1  0      
  2 24  1  0      
  3 25  1  0      
 10 26  1  0      
 11 27  1  0      
 18 28  1  0      
 19 29  1  0      
 20 30  1  0      
 21 31  1  0      
M  END
