# Supplementary material for: HPN, a Synthetic Analogue of Bromophenol from Red Alga Rhodomela confervoides: Synthesis and Anti-Diabetic Effects in C57BL/KsJ-db/db Mice
Source: MDPI journal article supplement (doi:10.3390/md11020350), 2013-01-30
Supplement: s3 [file s3]

marinedrugs-11-00350-s002.mol
  corina  05201404033D 1   1.00000     0.00000 
CORINA 3.49 0023  12.04.2013
 23 24  0  0  0  0  0  0  0  0999 V2000
   -0.0168    1.3872    0.0097 C   0  0  0  0  0  0  0  0  0  0  0  0
    0.0021   -0.0041    0.0020 C   0  0  0  0  0  0  0  0  0  0  0  0
    1.2134   -0.6777   -0.0132 C   0  0  0  0  0  0  0  0  0  0  0  0
    2.4005    0.0340   -0.0207 C   0  0  0  0  0  0  0  0  0  0  0  0
    2.3805    1.4169   -0.0126 C   0  0  0  0  0  0  0  0  0  0  0  0
    1.1750    2.0938    0.0021 C   0  0  0  0  0  0  0  0  0  0  0  0
    3.3959    3.5889   -0.0093 O   0  0  0  0  0  0  0  0  0  0  0  0
    3.6755    2.1876   -0.0198 C   0  0  0  0  0  0  0  0  0  0  0  0
    5.1169    6.8549   -0.0061 C   0  0  0  0  0  0  0  0  0  0  0  0
    4.1517    5.8644   -0.0031 C   0  0  0  0  0  0  0  0  0  0  0  0
    4.5624    4.4144   -0.0151 C   0  0  0  0  0  0  0  0  0  0  0  0
    4.7442    8.1879    0.0053 C   0  0  0  0  0  0  0  0  0  0  0  0
    3.4013    8.5313    0.0197 C   0  0  0  0  0  0  0  0  0  0  0  0
    2.4312    7.5339    0.0233 C   0  0  0  0  0  0  0  0  0  0  0  0
    2.8109    6.2015    0.0113 C   0  0  0  0  0  0  0  0  0  0  0  0
    1.1124    7.8664    0.0370 O   0  0  0  0  0  0  0  0  0  0  0  0
    3.0328    9.8405    0.0314 O   0  0  0  0  0  0  0  0  0  0  0  0
    6.0663    9.5398    0.0017 Br  0  0  0  0  0  0  0  0  0  0  0  0
    6.9492    6.3874   -0.0180 Br  0  0  0  0  0  0  0  0  0  0  0  0
    4.0524   -0.8860   -0.0414 Br  0  0  0  0  0  0  0  0  0  0  0  0
    1.2441   -2.5685   -0.0230 Br  0  0  0  0  0  0  0  0  0  0  0  0
   -1.2031    2.0523    0.0189 O   0  0  0  0  0  0  0  0  0  0  0  0
   -1.1656   -0.7015    0.0099 O   0  0  0  0  0  0  0  0  0  0  0  0
  1  2  2  0      
  2  3  1  0      
  3  4  2  0      
  4  5  1  0      
  5  6  2  0      
  6  1  1  0      
  7  8  1  0      
  8  5  1  0      
  9 10  2  0      
 10 11  1  0      
 11  7  1  0      
  9 12  1  0      
 12 13  2  0      
 13 14  1  0      
 14 15  2  0      
 15 10  1  0      
 14 16  1  0      
 13 17  1  0      
 12 18  1  0      
  9 19  1  0      
  4 20  1  0      
  3 21  1  0      
  1 22  1  0      
  2 23  1  0      
M  END
$$$$
