# Supplementary material for: HPN, a Synthetic Analogue of Bromophenol from Red Alga Rhodomela confervoides: Synthesis and Anti-Diabetic Effects in C57BL/KsJ-db/db Mice
Source: MDPI journal article supplement (doi:10.3390/md11020350), 2013-01-30
Supplement: s5 [file s5]

marinedrugs-11-00350-s003.mol
  corina  05201404033D 1   1.00000     0.00000 
CORINA 3.49 0023  12.04.2013
 21 22  0  0  0  0  0  0  0  0999 V2000
   -0.0168    1.3872    0.0097 C   0  0  0  0  0  0  0  0  0  0  0  0
    0.0021   -0.0041    0.0020 C   0  0  0  0  0  0  0  0  0  0  0  0
    1.2134   -0.6777   -0.0132 C   0  0  0  0  0  0  0  0  0  0  0  0
    2.4005    0.0340   -0.0207 C   0  0  0  0  0  0  0  0  0  0  0  0
    2.3805    1.4169   -0.0126 C   0  0  0  0  0  0  0  0  0  0  0  0
    1.1750    2.0938    0.0021 C   0  0  0  0  0  0  0  0  0  0  0  0
    3.6755    2.1876   -0.0198 C   0  0  0  0  0  0  0  0  0  0  0  0
    3.7526    3.1281    2.2982 C   0  0  0  0  0  0  0  0  0  0  0  0
    4.2459    2.2245    1.3746 C   0  0  0  0  0  0  0  0  0  0  0  0
    4.2733    3.1650    3.5801 C   0  0  0  0  0  0  0  0  0  0  0  0
    5.2909    2.2952    3.9396 C   0  0  0  0  0  0  0  0  0  0  0  0
    5.7861    1.3863    3.0097 C   0  0  0  0  0  0  0  0  0  0  0  0
    5.2609    1.3547    1.7279 C   0  0  0  0  0  0  0  0  0  0  0  0
    6.7849    0.5313    3.3579 O   0  0  0  0  0  0  0  0  0  0  0  0
    5.8043    2.3301    5.1986 O   0  0  0  0  0  0  0  0  0  0  0  0
    3.5970    4.4020    4.8404 Br  0  0  0  0  0  0  0  0  0  0  0  0
    2.3697    4.3204    1.8065 Br  0  0  0  0  0  0  0  0  0  0  0  0
    4.0524   -0.8860   -0.0414 Br  0  0  0  0  0  0  0  0  0  0  0  0
    1.2441   -2.5685   -0.0230 Br  0  0  0  0  0  0  0  0  0  0  0  0
   -1.2031    2.0523    0.0189 O   0  0  0  0  0  0  0  0  0  0  0  0
   -1.1656   -0.7015    0.0099 O   0  0  0  0  0  0  0  0  0  0  0  0
  1  2  2  0      
  2  3  1  0      
  3  4  2  0      
  4  5  1  0      
  5  6  2  0      
  6  1  1  0      
  7  5  1  0      
  8  9  2  0      
  8 10  1  0      
 10 11  2  0      
 11 12  1  0      
 12 13  2  0      
 13  9  1  0      
 12 14  1  0      
 11 15  1  0      
 10 16  1  0      
  8 17  1  0      
  4 18  1  0      
  3 19  1  0      
  1 20  1  0      
  2 21  1  0      
  7  9  1  0      
M  END
$$$$
