# Supplementary material for: HPN, a Synthetic Analogue of Bromophenol from Red Alga Rhodomela confervoides: Synthesis and Anti-Diabetic Effects in C57BL/KsJ-db/db Mice
Source: MDPI journal article supplement (doi:10.3390/md11020350), 2013-01-30
Supplement: s6 [file s6]

marinedrugs-11-00350-s003.mol
  ChemDraw04241410102D

 21 22  0  0  0  0  0  0  0  0999 V2000
   -2.1463    0.8250    0.0000 C   0  0  0  0  0  0  0  0  0  0  0  0
   -2.1463    0.0000    0.0000 C   0  0  0  0  0  0  0  0  0  0  0  0
   -1.4319   -0.4125    0.0000 C   0  0  0  0  0  0  0  0  0  0  0  0
   -0.7174    0.0000    0.0000 C   0  0  0  0  0  0  0  0  0  0  0  0
   -0.7174    0.8250    0.0000 C   0  0  0  0  0  0  0  0  0  0  0  0
   -1.4319    1.2375    0.0000 C   0  0  0  0  0  0  0  0  0  0  0  0
   -0.0029    1.2375    0.0000 C   0  0  0  0  0  0  0  0  0  0  0  0
    0.7174    0.0000    0.0000 C   0  0  0  0  0  0  0  0  0  0  0  0
    0.7174    0.8250    0.0000 C   0  0  0  0  0  0  0  0  0  0  0  0
    1.4319   -0.4125    0.0000 C   0  0  0  0  0  0  0  0  0  0  0  0
    2.1463    0.0000    0.0000 C   0  0  0  0  0  0  0  0  0  0  0  0
    2.1463    0.8250    0.0000 C   0  0  0  0  0  0  0  0  0  0  0  0
    1.4319    1.2375    0.0000 C   0  0  0  0  0  0  0  0  0  0  0  0
    2.8608    1.2375    0.0000 O   0  0  0  0  0  0  0  0  0  0  0  0
    2.8608   -0.4125    0.0000 O   0  0  0  0  0  0  0  0  0  0  0  0
    1.4319   -1.2375    0.0000 Br  0  0  0  0  0  0  0  0  0  0  0  0
    0.7174   -0.8250    0.0000 Br  0  0  0  0  0  0  0  0  0  0  0  0
   -0.7174   -0.8250    0.0000 Br  0  0  0  0  0  0  0  0  0  0  0  0
   -1.4319   -1.2375    0.0000 Br  0  0  0  0  0  0  0  0  0  0  0  0
   -2.8608    1.2375    0.0000 O   0  0  0  0  0  0  0  0  0  0  0  0
   -2.8608   -0.4125    0.0000 O   0  0  0  0  0  0  0  0  0  0  0  0
  1  2  2  0      
  2  3  1  0      
  3  4  2  0      
  4  5  1  0      
  5  6  2  0      
  6  1  1  0      
  7  5  1  0      
  8  9  2  0      
  8 10  1  0      
 10 11  2  0      
 11 12  1  0      
 12 13  2  0      
 13  9  1  0      
 12 14  1  0      
 11 15  1  0      
 10 16  1  0      
  8 17  1  0      
  4 18  1  0      
  3 19  1  0      
  1 20  1  0      
  2 21  1  0      
  7  9  1  0      
M  END
