# Supplementary material for: HPN, a Synthetic Analogue of Bromophenol from Red Alga Rhodomela confervoides: Synthesis and Anti-Diabetic Effects in C57BL/KsJ-db/db Mice
Source: MDPI journal article supplement (doi:10.3390/md11020350), 2013-01-30
Supplement: s7 [file s7]

marinedrugs-11-00350-s004.mol
  corina  05201404043D 1   1.00000     0.00000 
CORINA 3.49 0023  12.04.2013
 24 25  0  0  0  0  0  0  0  0999 V2000
    0.1558    0.9389   -0.5936 C   0  0  0  0  0  0  0  0  0  0  0  0
    0.1947   -0.2971    0.0311 C   0  0  0  0  0  0  0  0  0  0  0  0
    1.3682   -0.7277    0.6427 C   0  0  0  0  0  0  0  0  0  0  0  0
    2.4930    0.0818    0.6241 C   0  0  0  0  0  0  0  0  0  0  0  0
    2.4472    1.3150   -0.0016 C   0  0  0  0  0  0  0  0  0  0  0  0
    1.2814    1.7421   -0.6088 C   0  0  0  0  0  0  0  0  0  0  0  0
    4.0898   -0.4986    1.4543 Br  0  0  0  0  0  0  0  0  0  0  0  0
    3.9504    3.5494   -2.1056 C   0  0  0  0  0  0  0  0  0  0  0  0
    4.1521    2.3549   -1.4397 C   0  0  0  0  0  0  0  0  0  0  0  0
    3.6707    2.1945   -0.0206 C   0  0  0  0  0  0  0  0  0  0  0  0
    4.3922    3.6989   -3.4105 C   0  0  0  0  0  0  0  0  0  0  0  0
    5.0387    2.6452   -4.0485 C   0  0  0  0  0  0  0  0  0  0  0  0
    5.2380    1.4493   -3.3762 C   0  0  0  0  0  0  0  0  0  0  0  0
    4.7944    1.3063   -2.0732 C   0  0  0  0  0  0  0  0  0  0  0  0
    1.2367    3.0861   -1.2889 C   0  0  0  0  0  0  0  0  0  0  0  0
   -0.0657    3.2997   -1.8369 O   0  0  0  0  0  0  0  0  0  0  0  0
   -0.2157    4.5525   -2.5077 C   0  0  0  0  0  0  0  0  0  0  0  0
   -1.6409    4.6725   -3.0511 C   0  0  0  0  0  0  0  0  0  0  0  0
    5.0673   -0.3252   -1.1568 Br  0  0  0  0  0  0  0  0  0  0  0  0
    4.1936    4.8737   -4.0665 O   0  0  0  0  0  0  0  0  0  0  0  0
    6.1158    0.0139   -4.2394 Br  0  0  0  0  0  0  0  0  0  0  0  0
    5.4735    2.7877   -5.3293 O   0  0  0  0  0  0  0  0  0  0  0  0
   -0.9117   -1.0876    0.0470 O   0  0  0  0  0  0  0  0  0  0  0  0
    1.4111   -1.9402    1.2576 O   0  0  0  0  0  0  0  0  0  0  0  0
  1  2  2  0      
  2  3  1  0      
  3  4  2  0      
  4  5  1  0      
  5  6  2  0      
  6  1  1  0      
  4  7  1  0      
  8  9  2  0      
  9 10  1  0      
 10  5  1  0      
  8 11  1  0      
 11 12  2  0      
 12 13  1  0      
 13 14  2  0      
 14  9  1  0      
  6 15  1  0      
 15 16  1  0      
 16 17  1  0      
 17 18  1  0      
 14 19  1  0      
 11 20  1  0      
 13 21  1  0      
 12 22  1  0      
  2 23  1  0      
  3 24  1  0      
M  END
$$$$
