# Supplementary material for: HPN, a Synthetic Analogue of Bromophenol from Red Alga Rhodomela confervoides: Synthesis and Anti-Diabetic Effects in C57BL/KsJ-db/db Mice
Source: MDPI journal article supplement (doi:10.3390/md11020350), 2013-01-30
Supplement: s8 [file s8]

marinedrugs-11-00350-s004.mol
  ChemDraw04241410102D

 24 25  0  0  0  0  0  0  0  0999 V2000
   -2.1434   -0.4125    0.0000 C   0  0  0  0  0  0  0  0  0  0  0  0
   -2.1434   -1.2375    0.0000 C   0  0  0  0  0  0  0  0  0  0  0  0
   -1.4289   -1.6500    0.0000 C   0  0  0  0  0  0  0  0  0  0  0  0
   -0.7145   -1.2375    0.0000 C   0  0  0  0  0  0  0  0  0  0  0  0
   -0.7145   -0.4125    0.0000 C   0  0  0  0  0  0  0  0  0  0  0  0
   -1.4289    0.0000    0.0000 C   0  0  0  0  0  0  0  0  0  0  0  0
    0.0000   -1.6500    0.0000 Br  0  0  0  0  0  0  0  0  0  0  0  0
    0.7145   -1.2375    0.0000 C   0  0  0  0  0  0  0  0  0  0  0  0
    0.7145   -0.4125    0.0000 C   0  0  0  0  0  0  0  0  0  0  0  0
    0.0000    0.0000    0.0000 C   0  0  0  0  0  0  0  0  0  0  0  0
    1.4289   -1.6500    0.0000 C   0  0  0  0  0  0  0  0  0  0  0  0
    2.1434   -1.2375    0.0000 C   0  0  0  0  0  0  0  0  0  0  0  0
    2.1434   -0.4125    0.0000 C   0  0  0  0  0  0  0  0  0  0  0  0
    1.4289    0.0000    0.0000 C   0  0  0  0  0  0  0  0  0  0  0  0
   -1.4289    0.8250    0.0000 C   0  0  0  0  0  0  0  0  0  0  0  0
   -2.1434    1.2375    0.0000 O   0  0  0  0  0  0  0  0  0  0  0  0
   -2.1434    2.0625    0.0000 C   0  0  0  0  0  0  0  0  0  0  0  0
   -1.4289    2.4750    0.0000 C   0  0  0  0  0  0  0  0  0  0  0  0
    1.4289    0.8250    0.0000 Br  0  0  0  0  0  0  0  0  0  0  0  0
    1.4289   -2.4750    0.0000 O   0  0  0  0  0  0  0  0  0  0  0  0
    2.8579    0.0000    0.0000 Br  0  0  0  0  0  0  0  0  0  0  0  0
    2.8579   -1.6500    0.0000 O   0  0  0  0  0  0  0  0  0  0  0  0
   -2.8579   -1.6500    0.0000 O   0  0  0  0  0  0  0  0  0  0  0  0
   -1.4289   -2.4750    0.0000 O   0  0  0  0  0  0  0  0  0  0  0  0
  1  2  2  0      
  2  3  1  0      
  3  4  2  0      
  4  5  1  0      
  5  6  2  0      
  6  1  1  0      
  4  7  1  0      
  8  9  2  0      
  9 10  1  0      
 10  5  1  0      
  8 11  1  0      
 11 12  2  0      
 12 13  1  0      
 13 14  2  0      
 14  9  1  0      
  6 15  1  0      
 15 16  1  0      
 16 17  1  0      
 17 18  1  0      
 14 19  1  0      
 11 20  1  0      
 13 21  1  0      
 12 22  1  0      
  2 23  1  0      
  3 24  1  0      
M  END
