# Supplementary material for: HPN, a Synthetic Analogue of Bromophenol from Red Alga Rhodomela confervoides: Synthesis and Anti-Diabetic Effects in C57BL/KsJ-db/db Mice
Source: MDPI journal article supplement (doi:10.3390/md11020350), 2013-01-30
Supplement: s9 [file s9]

marinedrugs-11-00350-s005.mol
  corina  05201404043D 1   1.00000     0.00000 
CORINA 3.49 0023  12.04.2013
 25 26  0  0  0  0  0  0  0  0999 V2000
    0.1566    0.9378   -0.5960 C   0  0  0  0  0  0  0  0  0  0  0  0
    0.1947   -0.2971    0.0311 C   0  0  0  0  0  0  0  0  0  0  0  0
    1.3674   -0.7266    0.6450 C   0  0  0  0  0  0  0  0  0  0  0  0
    2.4923    0.0830    0.6264 C   0  0  0  0  0  0  0  0  0  0  0  0
    2.4472    1.3150   -0.0016 C   0  0  0  0  0  0  0  0  0  0  0  0
    1.2821    1.7409   -0.6111 C   0  0  0  0  0  0  0  0  0  0  0  0
    4.0880   -0.4959    1.4598 Br  0  0  0  0  0  0  0  0  0  0  0  0
    3.9552    3.5512   -2.1037 C   0  0  0  0  0  0  0  0  0  0  0  0
    4.1521    2.3549   -1.4397 C   0  0  0  0  0  0  0  0  0  0  0  0
    3.6707    2.1945   -0.0206 C   0  0  0  0  0  0  0  0  0  0  0  0
    4.3971    3.7008   -3.4086 C   0  0  0  0  0  0  0  0  0  0  0  0
    5.0387    2.6452   -4.0485 C   0  0  0  0  0  0  0  0  0  0  0  0
    5.2331    1.4474   -3.3781 C   0  0  0  0  0  0  0  0  0  0  0  0
    4.7895    1.3045   -2.0750 C   0  0  0  0  0  0  0  0  0  0  0  0
    1.2384    3.0837   -1.2938 C   0  0  0  0  0  0  0  0  0  0  0  0
   -0.0633    3.2962   -1.8439 O   0  0  0  0  0  0  0  0  0  0  0  0
   -0.2125    4.5478   -2.5172 C   0  0  0  0  0  0  0  0  0  0  0  0
   -1.2424    4.4036   -3.6394 C   0  0  0  0  0  0  0  0  0  0  0  0
    5.0558   -0.3296   -1.1613 Br  0  0  0  0  0  0  0  0  0  0  0  0
    4.2033    4.8774   -4.0628 O   0  0  0  0  0  0  0  0  0  0  0  0
    6.1042    0.0095   -4.2439 Br  0  0  0  0  0  0  0  0  0  0  0  0
    5.4735    2.7877   -5.3293 O   0  0  0  0  0  0  0  0  0  0  0  0
   -0.9117   -1.0877    0.0470 O   0  0  0  0  0  0  0  0  0  0  0  0
    1.4095   -1.9379    1.2622 O   0  0  0  0  0  0  0  0  0  0  0  0
   -0.6875    5.6087   -1.5223 C   0  0  0  0  0  0  0  0  0  0  0  0
  1  2  2  0      
  2  3  1  0      
  3  4  2  0      
  4  5  1  0      
  5  6  2  0      
  6  1  1  0      
  4  7  1  0      
  8  9  2  0      
  9 10  1  0      
 10  5  1  0      
  8 11  1  0      
 11 12  2  0      
 12 13  1  0      
 13 14  2  0      
 14  9  1  0      
  6 15  1  0      
 15 16  1  0      
 16 17  1  0      
 17 18  1  0      
 14 19  1  0      
 11 20  1  0      
 13 21  1  0      
 12 22  1  0      
  2 23  1  0      
  3 24  1  0      
 17 25  1  0      
M  END
$$$$
